# Supplementary material for: Effect of innovation capacity, production capacity and vertical specialization on innovation performance in China's electronic manufacturing: Analysis from the supply and demand sides
Source: PLoS One. 2018 Jul 16;13(7):e0200642. doi: 10.1371/journal.pone.0200642 (PMC6065606; doi:10.1371/journal.pone.0200642)
Supplement: S1 File — (DOCX) [file pone.0200642.s001.docx]

# Appendix A: Derivation of Equation (6)

For , recall by definition, we have

(A1)

We define “#” as element-wise matrix multiplication operation, which means if a matrix is multiplied by another matrix, the elements in the first matrix is multiplied by the corresponding elements in the second matrix, and we define “/” as the element-wise matrix division operation. We have the following formula from Eq.(A1) as:

(A2)

where , and .

Substituting for Eq.(A2) in the third term of Eq.(5) and can be further decomposed into two components:

(A3)

# Appendix B: Derivation of Equation (7)

For , as we defined in the previous statement , can be rewritten as:

(B1)

Where , , , , ,

We apply Eq.(B1) into the fourth term of Eq.(5), we can have the further decomposition of as:

(B2)

Where is the diagonal matrix with all diagonal elements equal to , and is similar to .

# Appendix C: Derivation of Equation (12)

For , the change of local Ghosh inverse matrix can be rewritten as the following formula according to its definition:

(C1)

We substitute for (where , ) in Eq.(C1) and apply it into the third term of eq.(11), and then we have:

(C2)

# Appendix D: Derivation of Equation (13)

For , we rearrange the formula of , and we have:

(D1)

Where ，，，

Applying Eq.(D1) into the fourth term of Eq.(11), we have:

(D2)
